# Supplementary material
Source: MDPI journal article supplement (https://www.mdpi.com/2077-1444/3/4/1025)
Supplement: s1 [file s1]

*Correction*

**Bickmann, Claudia. “The Idea of a Highest Divine Principle—Founding Reason and Spirituality. A Necessary Concept of a Comparative Philosophy?” *Religions* 3 (2012): 1025–40**

**Claudia Bickmann**

Philosophical Seminary of the University of Cologne, University of Cologne, Albertus Magnus Platz, D-50937 Cologne, Germany; E-Mail: Claudia.Bickmann@uni-koeln.de; Tel.: +49-221-2825188

*Received: 7 January 2014 / Published: 16 January 2014*

---

The author wishes to add the following correction to her paper published in *Religions* [1]:

Reference [28] on pages 1035 and 1040 should be [27] and the citation to [27] on p. 1035 should be removed. The author apologizes for any inconvenience.

**Reference**

1. Bickmann, Claudia. “The Idea of a Highest Divine Principle—Founding Reason and Spirituality. A Necessary Concept of a Comparative Philosophy?” *Religions* 3 (2012): 1025–40.

© 2014 by the author; licensee MDPI, Basel, Switzerland. This article is an open access article distributed under the terms and conditions of the Creative Commons Attribution license (<http://creativecommons.org/licenses/by/3.0/>).
